# Supplementary material
Source: Springer Nature journal article supplement (https://www.springermedizin.de/resource/supplementary/12889_2012_4374_MOESM2_ESM.pdf/9492240)
Supplement: MOESM2 [file 9492240]

## Additional file 2: Reasons for non-adherence to medication and exercise

| Medication specific                                                                                                           | Both                          | Exercise specific                                                      |
|-------------------------------------------------------------------------------------------------------------------------------|-------------------------------|------------------------------------------------------------------------|
| <i>In the past 3 months how often have you missed taking your medication / attending your exercise session because you...</i> |                               |                                                                        |
| had too many pills to take                                                                                                    | were away from home           | felt tired                                                             |
| wanted to avoid side effects                                                                                                  | were busy with other things   | don't like the gym                                                     |
| did not want others to notice you are taking medication                                                                       | simply forgot                 | felt embarrassed if other people saw you exercising                    |
| felt like the drug was toxic/harmful                                                                                          | had a change in daily routine | don't feel comfortable in exercise clothes                             |
| fell asleep/slept through dose time                                                                                           | felt depressed/overwhelmed    | didn't like being ridiculed by others for exercising                   |
| had problems taking pills at specified times (with meals, empty stomach, etc.)                                                | felt sick or ill              | felt that people important to you complained about the time commitment |
| ran out of pills                                                                                                              | felt good                     | felt like exercise was painful                                         |
| felt taking medication pointless                                                                                              |                               | were injured                                                           |
| felt taking medication all the time tiresome                                                                                  |                               | felt that you were out of your own environment                         |
|                                                                                                                               |                               | had personal problems                                                  |
|                                                                                                                               |                               | disagree with the reason(s) why exercise was prescribed to you         |
|                                                                                                                               |                               | felt physical discomfort during exercise                               |
|                                                                                                                               |                               | felt doing exercise was pointless                                      |
|                                                                                                                               |                               | felt that exercise twice a week tiresome                               |
